# Supplementary material for: Temperature- and vapor-induced reversible single-crystal-to-single-crystal transformations of three 2D/3D GdIII–organic frameworks exhibiting significant magnetocaloric effects
Source: Royal Society of Chemistry journal article supplement (doi:10.1039/c6dt03589b), 2016-12-05
Supplement: c6dt03589b1.pdf [file c6dt03589b1.pdf]

## ***Electronic Supplementary Information (ESI)***

**Temperature- and vapor-induced reversible single-crystal-to-single-crystal transformations of three 2D/3D Gd<sup>III</sup>-organic frameworks exhibiting significant magnetocaloric effects**

**Sui-Jun Liu,\*<sup>a</sup> Chen Cao,<sup>a</sup> Shu-Li Yao,<sup>a</sup> Teng-Fei Zheng,<sup>a</sup> Zheng-Xiang Wang,<sup>a</sup> Chao Liu,<sup>a</sup> Jin-Sheng Liao,<sup>a</sup> Jing-Lin Chen,<sup>a</sup> Yun-Wu Li\*<sup>b</sup> and He-Rui Wen\*<sup>a</sup>**

<sup>a</sup>School of Metallurgy and Chemical Engineering, Jiangxi University of Science and Technology, Ganzhou 341000, Jiangxi Province, P.R. China

E-mail: liusuijun147@163.com, wenherui63@163.com. Tel: +86-797-8312204, +86-797-8312553

<sup>b</sup>School of Chemistry and Chemical Engineering, Shandong Provincial Key Laboratory of Chemical Energy Storage and Novel Cell Technology, Liaocheng University, Liaocheng 252000, P. R. China

E-mail: lyw5251851@163.com

---

\*Corresponding author. E-mail: liusuijun147@163.com (S.-J. Liu), wenherui63@163.com (H.-R. Wen), lyw5251851@163.com (Y.-W. Li). Tel: +86-797-8312204, +86-797-8312553.

**Table S1.** Selected bond lengths (Å) and angles (°) for **1<sup>a</sup>**

|                                        |            |                                        |            |
|----------------------------------------|------------|----------------------------------------|------------|
| Gd1—O1 <sup>#2</sup>                   | 2.424(4)   | Gd1—O1                                 | 2.519(3)   |
| Gd1—O6                                 | 2.431(3)   | Gd1—O4 <sup>#2</sup>                   | 2.544(4)   |
| Gd1—O2W                                | 2.439(4)   | Gd1—O2                                 | 2.585(4)   |
| Gd1—O5 <sup>#1</sup>                   | 2.446(4)   | Gd1—O3 <sup>#3</sup>                   | 2.650(4)   |
| Gd1—O1W                                | 2.477(4)   | Gd1—O4 <sup>#3</sup>                   | 2.477(4)   |
|                                        |            |                                        |            |
| O1 <sup>#2</sup> —Gd1—O6               | 82.51(12)  | O2—Gd1—O3 <sup>#3</sup>                | 69.84(12)  |
| O1 <sup>#2</sup> —Gd1—O2W              | 84.50(13)  | O4 <sup>#3</sup> —Gd1—O1               | 148.89(12) |
| O6—Gd1—O2W                             | 138.42(13) | O1 <sup>#2</sup> —Gd1—O4 <sup>#2</sup> | 66.06(12)  |
| O1 <sup>#2</sup> —Gd1—O5 <sup>#1</sup> | 71.85(13)  | O6—Gd1—O4 <sup>#2</sup>                | 68.47(12)  |
| O6—Gd1—O5 <sup>#1</sup>                | 66.84(12)  | O2W—Gd1—O4 <sup>#2</sup>               | 70.14(13)  |
| O2W—Gd1—O5 <sup>#1</sup>               | 143.32(13) | O5 <sup>#1</sup> —Gd1—O4 <sup>#2</sup> | 121.08(12) |
| O1 <sup>#2</sup> —Gd1—O1W              | 137.26(13) | O1W—Gd1—O4 <sup>#2</sup>               | 125.54(12) |
| O6—Gd1—O1W                             | 68.95(13)  | O4 <sup>#3</sup> —Gd1—O4 <sup>#2</sup> | 63.26(14)  |
| O2W—Gd1—O1W                            | 137.70(14) | O1—Gd1—O4 <sup>#2</sup>                | 115.54(12) |
| O5 <sup>#1</sup> —Gd1—O1W              | 67.97(13)  | O1 <sup>#2</sup> —Gd1—O2               | 109.46(12) |
| O1 <sup>#2</sup> —Gd1—O4 <sup>#3</sup> | 129.21(12) | O6—Gd1—O2                              | 132.96(13) |
| O6—Gd1—O4 <sup>#3</sup>                | 76.52(12)  | O2W—Gd1—O2                             | 88.59(14)  |
| O2W—Gd1—O4 <sup>#3</sup>               | 81.75(12)  | O5 <sup>#1</sup> —Gd1—O2               | 74.07(13)  |
| O5 <sup>#1</sup> —Gd1—O4 <sup>#3</sup> | 134.93(12) | O1W—Gd1—O2                             | 72.90(13)  |
| O1W—Gd1—O4 <sup>#3</sup>               | 75.11(13)  | O4 <sup>#3</sup> —Gd1—O2               | 118.75(12) |
| O1 <sup>#2</sup> —Gd1—O1               | 61.75(14)  | O1—Gd1—O2                              | 50.32(12)  |
| O6—Gd1—O1                              | 133.74(12) | O4 <sup>#2</sup> —Gd1—O2               | 158.41(13) |
| O2W—Gd1—O1                             | 69.82(12)  | O1 <sup>#2</sup> —Gd1—O3 <sup>#3</sup> | 152.66(12) |
| O5 <sup>#1</sup> —Gd1—O1               | 74.32(12)  | O6—Gd1—O3 <sup>#3</sup>                | 118.77(12) |
| O1W—Gd1—O1                             | 118.23(12) | O2W—Gd1—O3 <sup>#3</sup>               | 68.20(13)  |
| O1—Gd1—O3 <sup>#3</sup>                | 105.22(11) | O5 <sup>#1</sup> —Gd1—O3 <sup>#3</sup> | 130.48(12) |
| O4 <sup>#2</sup> —Gd1—O3 <sup>#3</sup> | 104.03(12) | O1W—Gd1—O3 <sup>#3</sup>               | 69.74(13)  |
| O4 <sup>#3</sup> —Gd1—O3 <sup>#3</sup> | 50.38(12)  |                                        |            |

<sup>a</sup>Symmetry codes: #1:  $-x+1, -y+1, -z+1$ ; #2:  $-x+1, -y+2, -z+1$ ; #3:  $x+1, y, z$ ; #4:  $x-1, y, z$ .

**Table S2.** Selected bond lengths (Å) and angles (°) for **1a<sup>a</sup>**

|                                        |           |                                        |           |
|----------------------------------------|-----------|----------------------------------------|-----------|
| Gd1—O1W                                | 2.426(15) | Gd1—O3 <sup>#5</sup>                   | 2.499(12) |
| Gd1—O5                                 | 2.451(13) | Gd1—O6 <sup>#3</sup>                   | 2.500(14) |
| Gd1—O1 <sup>#4</sup>                   | 2.484(16) | Gd1—O2 <sup>#1</sup>                   | 2.514(14) |
| Gd1—O3 <sup>#1</sup>                   | 2.489(13) | Gd1—O2                                 | 2.517(12) |
| Gd1—O1                                 | 2.867(15) | Gd1—O4 <sup>#5</sup>                   | 2.583(16) |
| <hr/>                                  |           |                                        |           |
| O1W—Gd1—O5                             | 140.9(5)  | O1W—Gd1—O4 <sup>#5</sup>               | 70.4(6)   |
| O1W—Gd1—O1 <sup>#4</sup>               | 134.6(5)  | O5—Gd1—O4 <sup>#5</sup>                | 138.8(5)  |
| O5—Gd1—O1 <sup>#4</sup>                | 71.3(5)   | O1 <sup>#4</sup> —Gd1—O4 <sup>#5</sup> | 68.4(5)   |
| O1W—Gd1—O3 <sup>#1</sup>               | 71.6(5)   | O3 <sup>#1</sup> —Gd1—O4 <sup>#5</sup> | 104.0(5)  |
| O5—Gd1—O3 <sup>#1</sup>                | 111.1(5)  | O3 <sup>#5</sup> —Gd1—O4 <sup>#5</sup> | 50.8(4)   |
| O1 <sup>#4</sup> —Gd1—O3 <sup>#1</sup> | 136.9(4)  | O6 <sup>#3</sup> —Gd1—O4 <sup>#5</sup> | 111.3(5)  |
| O1W—Gd1—O3 <sup>#5</sup>               | 81.5(4)   | O2 <sup>#1</sup> —Gd1—O4 <sup>#5</sup> | 149.2(5)  |
| O5—Gd1—O3 <sup>#5</sup>                | 135.3(4)  | O2—Gd1—O4 <sup>#5</sup>                | 107.4(5)  |
| O1 <sup>#4</sup> —Gd1—O3 <sup>#5</sup> | 87.0(4)   | O1W—Gd1—O1                             | 82.2(5)   |
| O3 <sup>#1</sup> —Gd1—O3 <sup>#5</sup> | 60.5(5)   | O5—Gd1—O1                              | 88.1(5)   |
| O1W—Gd1—O6 <sup>#3</sup>               | 140.1(5)  | O1 <sup>#4</sup> —Gd1—O1               | 65.1(5)   |
| O5—Gd1—O6 <sup>#3</sup>                | 64.5(4)   | O3 <sup>#1</sup> —Gd1—O1               | 153.7(4)  |
| O1 <sup>#4</sup> —Gd1—O6 <sup>#3</sup> | 74.3(5)   | O3 <sup>#5</sup> —Gd1—O1               | 118.1(4)  |
| O3 <sup>#1</sup> —Gd1—O6 <sup>#3</sup> | 69.4(4)   | O6 <sup>#3</sup> —Gd1—O1               | 136.8(5)  |
| O3 <sup>#5</sup> —Gd1—O6 <sup>#3</sup> | 72.2(4)   | O2 <sup>#1</sup> —Gd1—O1               | 108.1(4)  |
| O1W—Gd1—O2 <sup>#1</sup>               | 78.9(5)   | O2—Gd1—O1                              | 48.1(4)   |
| O5—Gd1—O2 <sup>#1</sup>                | 68.4(5)   | O4 <sup>#5</sup> —Gd1—O1               | 67.5(4)   |
| O1 <sup>#4</sup> —Gd1—O2 <sup>#1</sup> | 139.4(5)  | O5—Gd1—O2                              | 74.0(5)   |
| O3 <sup>#1</sup> —Gd1—O2 <sup>#1</sup> | 65.8(4)   | O1 <sup>#4</sup> —Gd1—O2               | 103.8(5)  |
| O3 <sup>#5</sup> —Gd1—O2 <sup>#1</sup> | 126.2(4)  | O3 <sup>#1</sup> —Gd1—O2               | 118.5(4)  |
| O6 <sup>#3</sup> —Gd1—O2 <sup>#1</sup> | 92.8(5)   | O3 <sup>#5</sup> —Gd1—O2               | 150.5(5)  |
| O1W—Gd1—O2                             | 71.4(5)   | O6 <sup>#3</sup> —Gd1—O2               | 136.9(5)  |
| O2 <sup>#1</sup> —Gd1—O2               | 60.1(5)   |                                        |           |

<sup>a</sup>Symmetry codes: #1:  $-x, -y+1, -z+1$ ; #3:  $-x+1, -y+1, -z+2$ ; #4:  $-x+1, -y+1, -z+1$ ; #5:  $x, y-1, z$ .

**Table S3.** Selected bond lengths (Å) and angles (°) for **1b<sup>a</sup>**

|                                        |           |                                        |           |
|----------------------------------------|-----------|----------------------------------------|-----------|
| Gd1—O5                                 | 2.305(15) | Gd1—O1 <sup>#5</sup>                   | 2.451(16) |
| Gd1—O6 <sup>#1</sup>                   | 2.364(16) | Gd1—O2                                 | 2.470(15) |
| Gd1—O3 <sup>#4</sup>                   | 2.423(18) | Gd1—O2 <sup>#3</sup>                   | 2.472(16) |
| Gd1—O4 <sup>#4</sup>                   | 2.517(17) | Gd1—O4 <sup>#3</sup>                   | 2.492(17) |
| Gd1—O1                                 | 2.664(15) |                                        |           |
| O5—Gd1—O6 <sup>#1</sup>                | 68.8(5)   | O3 <sup>#4</sup> —Gd1—O4 <sup>#4</sup> | 52.6(5)   |
| O5—Gd1—O3 <sup>#4</sup>                | 131.5(5)  | O1 <sup>#5</sup> —Gd1—O4 <sup>#4</sup> | 75.7(5)   |
| O6 <sup>#1</sup> —Gd1—O3 <sup>#4</sup> | 142.7(6)  | O2—Gd1—O4 <sup>#4</sup>                | 134.9(5)  |
| O5—Gd1—O1 <sup>#5</sup>                | 79.4(5)   | O2 <sup>#3</sup> —Gd1—O4 <sup>#4</sup> | 128.6(5)  |
| O6 <sup>#1</sup> —Gd1—O1 <sup>#5</sup> | 77.6(6)   | O4 <sup>#3</sup> —Gd1—O4 <sup>#4</sup> | 64.6(6)   |
| O3 <sup>#4</sup> —Gd1—O1 <sup>#5</sup> | 77.2(5)   | O5—Gd1—O1                              | 131.3(5)  |
| O5—Gd1—O2                              | 143.1(5)  | O6 <sup>#1</sup> —Gd1—O1               | 72.8(5)   |
| O6 <sup>#1</sup> —Gd1—O2               | 80.4(5)   | O3 <sup>#4</sup> —Gd1—O1               | 71.5(5)   |
| O3 <sup>#4</sup> —Gd1—O2               | 85.4(5)   | O1 <sup>#5</sup> —Gd1—O1               | 63.8(5)   |
| O1 <sup>#5</sup> —Gd1—O2               | 114.1(5)  | O2—Gd1—O1                              | 50.4(5)   |
| O5—Gd1—O2 <sup>#3</sup>                | 83.2(5)   | O2 <sup>#3</sup> —Gd1—O1               | 110.7(5)  |
| O6 <sup>#1</sup> —Gd1—O2 <sup>#3</sup> | 70.1(6)   | O4 <sup>#3</sup> —Gd1—O1               | 144.8(5)  |
| O3 <sup>#4</sup> —Gd1—O2 <sup>#3</sup> | 133.9(5)  | O4 <sup>#4</sup> —Gd1—O1               | 116.5(5)  |
| O1 <sup>#5</sup> —Gd1—O2 <sup>#3</sup> | 147.1(5)  | O1 <sup>#5</sup> —Gd1—O4 <sup>#3</sup> | 138.9(5)  |
| O2—Gd1—O2 <sup>#3</sup>                | 67.0(6)   | O2—Gd1—O4 <sup>#3</sup>                | 101.8(5)  |
| O5—Gd1—O4 <sup>#3</sup>                | 83.8(5)   | O2 <sup>#3</sup> —Gd1—O4 <sup>#3</sup> | 65.3(6)   |
| O6 <sup>#1</sup> —Gd1—O4 <sup>#3</sup> | 129.8(6)  | O5—Gd1—O4 <sup>#4</sup>                | 80.8(5)   |
| O3 <sup>#4</sup> —Gd1—O4 <sup>#3</sup> | 86.8(6)   | O6 <sup>#1</sup> —Gd1—O4 <sup>#4</sup> | 142.5(5)  |

<sup>a</sup>Symmetry codes: #1: -x, -y+1, -z+3; #2: x, y+1, z; #3: -x+1, -y+1, -z+2; #4: x, y-1, z; #5: -x, -y+1, -z+2.

**Table S4.** Hydrogen-Bonding Geometry (Å, °) for **1**

| <b>D–H···A</b> | <b>D–H</b> | <b>H···A</b> | <b>D···A</b> | <b>D–H···A</b> |
|----------------|------------|--------------|--------------|----------------|
| O2W–H2WA···O5  | 0.85       | 2.02         | 2.8223       | 157            |
| O2W–H2WB···O6  | 0.85       | 2.02         | 2.8230       | 157            |
| O1W–H1WB···O3  | 0.85       | 1.89         | 2.7202       | 166            |
| O1W–H1WA···O2  | 0.85       | 2.00         | 2.7320       | 143            |
| C2–H2A···O3    | 0.97       | 2.60         | 3.5371       | 163            |

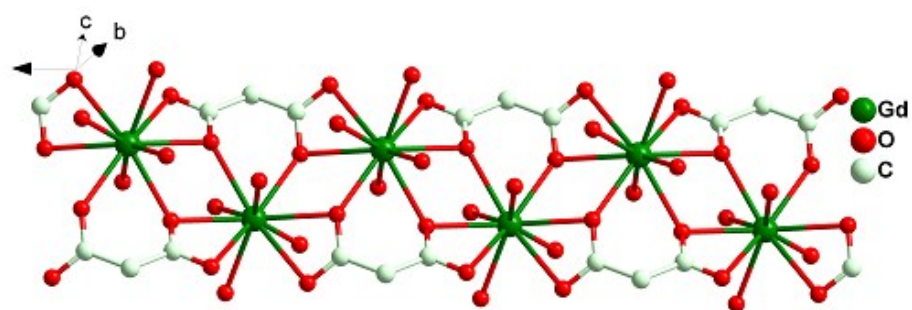

(a)

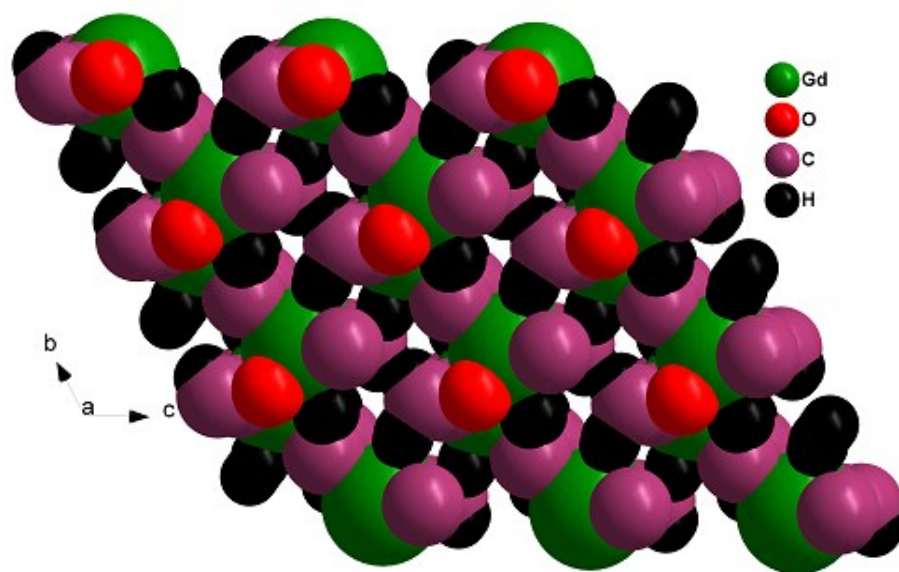

(b)

**Fig. S1.** View of (a) the 1D  $[\text{Gd}(\text{pda})]_n$  chain in **1**; (b) the 3D packing structure of **1**.

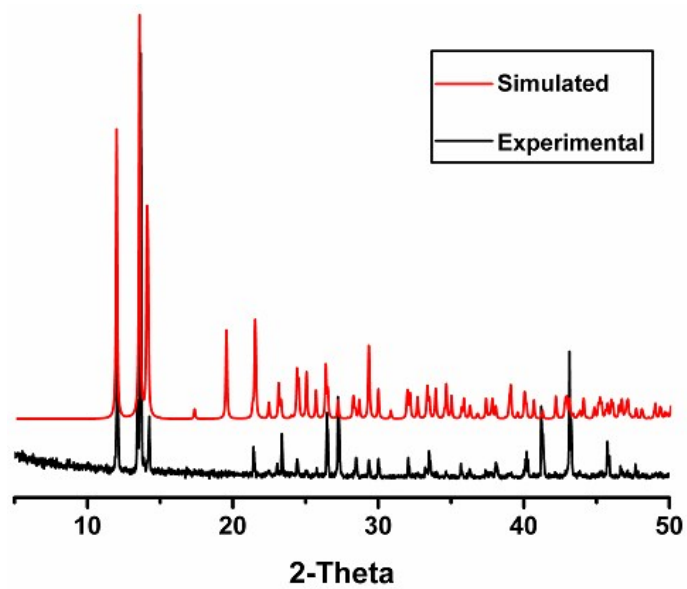

(a)

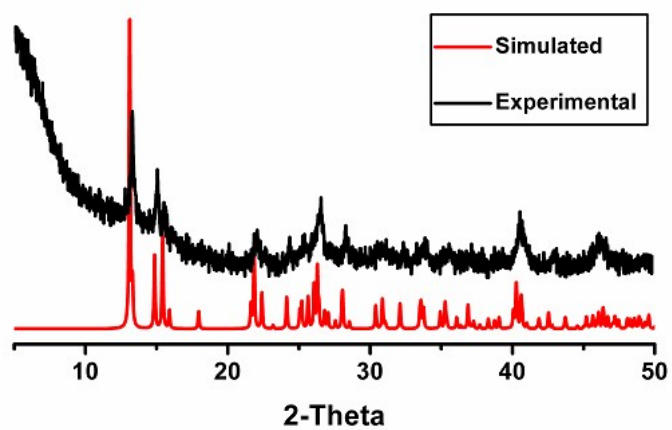

(b)

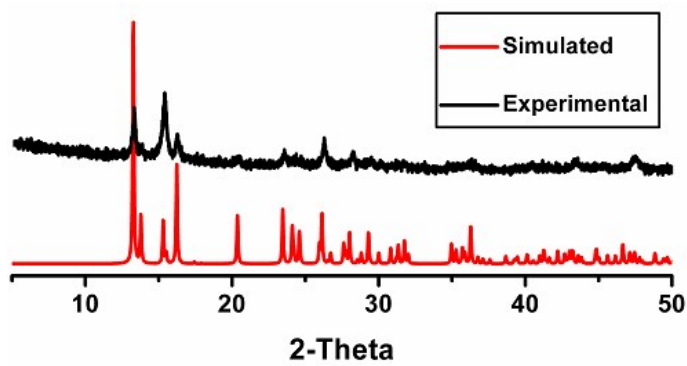

(c)

Fig. S2. XRPD patterns of **1** (a), **1a** (b) and **1b** (c).

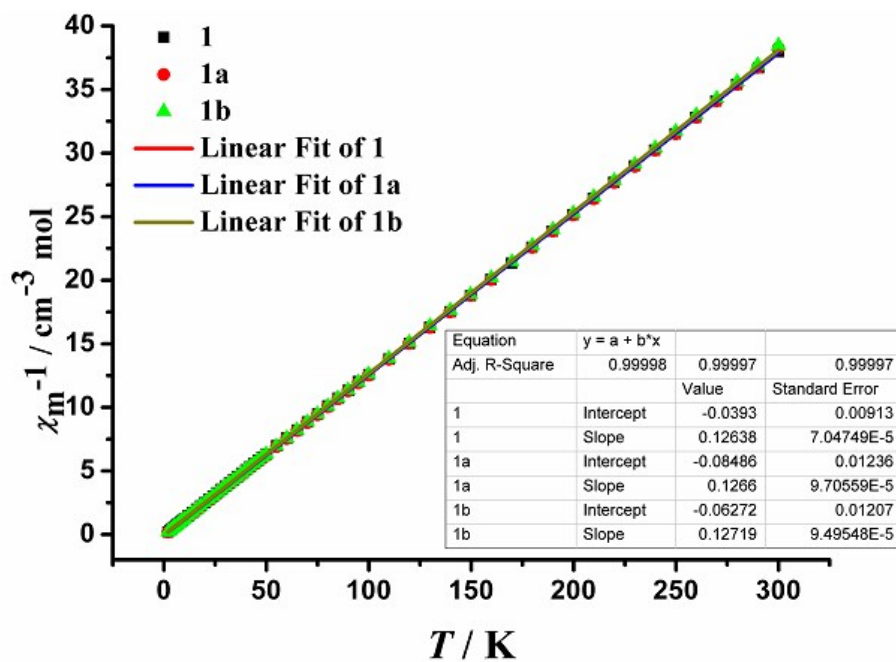

Fig. S3. The plots of  $\chi_m^{-1}$  vs.  $T$  and the corresponding Curie-Weiss fitting curves for **1**, **1a** and **1b**.

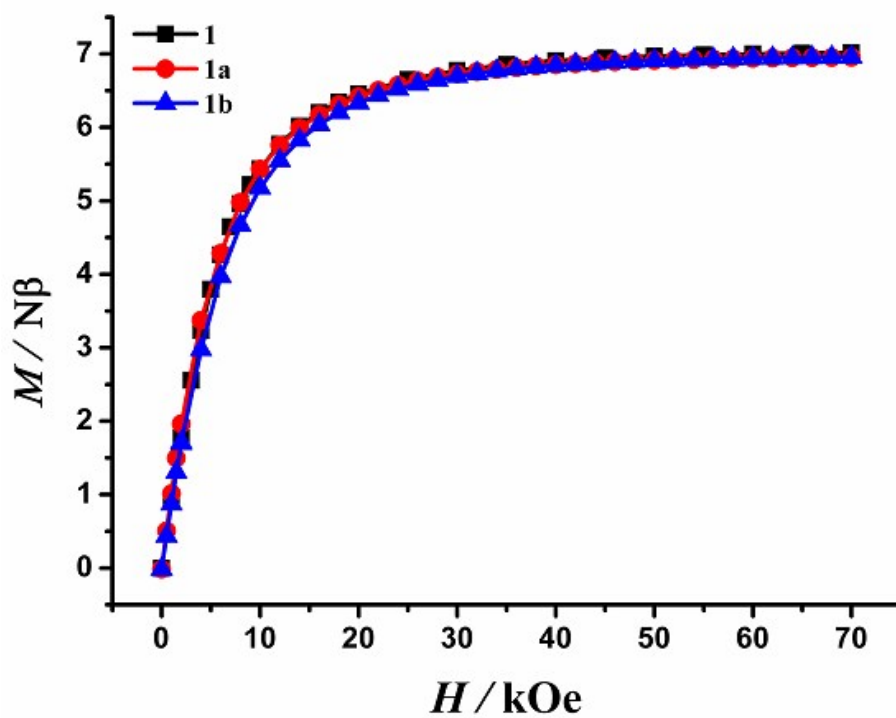

Fig. S4. The  $M$  vs.  $H$  curves at 2.0 K of **1**, **1a** and **1b**.



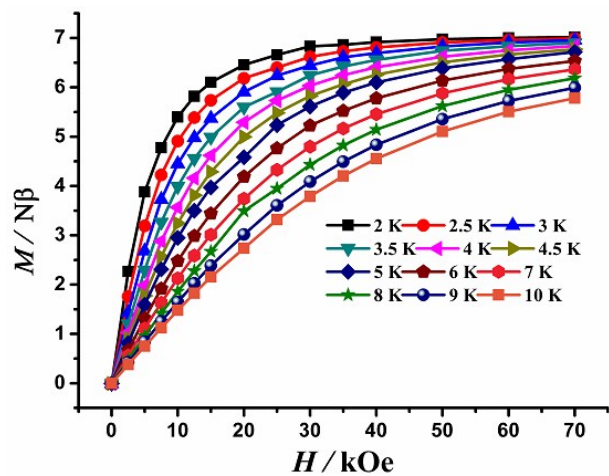

(a)

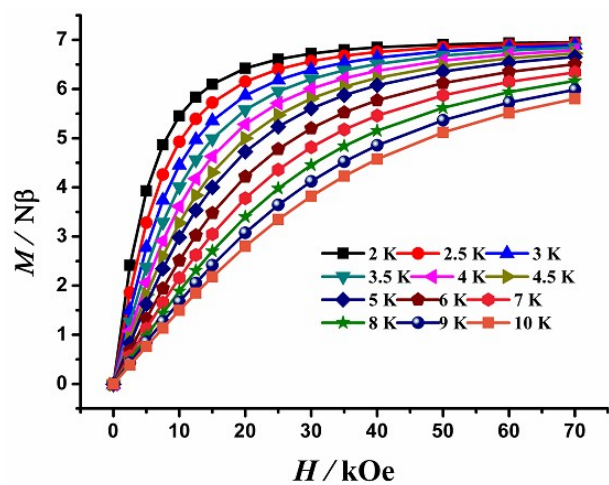

(b)

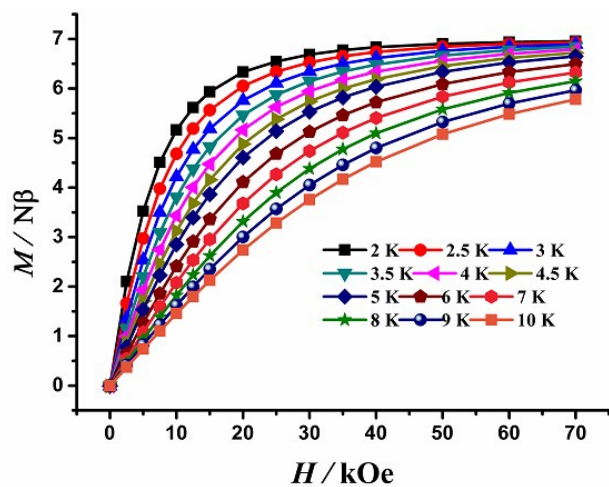

(c)

**Fig. S5.** The  $M$  vs.  $H$  plots of **1** (a), **1a** (b) and **1b** (c) at the indicated temperatures
